# Supplementary material for: Comparison of Clean-Up Methods for Ochratoxin A on Wine, Beer, Roasted Coffee and Chili Commercialized in Italy
Source: Toxins (Basel). 2013 Oct 22;5(10):1827–44. doi: 10.3390/toxins5101827 (PMC3813914; doi:10.3390/toxins5101827)
Supplement: Supplementary File 1 — Supplementary Table 1 (PDF, 7 KB) [file toxins-05-01827-s001.pdf]

**Supplementary Table 1.** Comparison between Spadaro's and manufacture's methods in wine matrix.

| <b>Clean-up method</b>          | <b>Validation<br/>levels (µg/L)</b> | <b>Recovery (%)<br/>(<i>n</i> = 3)</b> | <b>RSD (%)<br/>(<i>n</i> = 3)</b> | <b>LOD (µg/L)<br/>(<i>n</i> = 3)</b> | <b>LOQ (µg/L)<br/>(<i>n</i> = 3)</b> |
|---------------------------------|-------------------------------------|----------------------------------------|-----------------------------------|--------------------------------------|--------------------------------------|
| Method of Spadaro <i>et al.</i> | 2                                   | 84.03                                  | 19.22                             | 0.14                                 | 0.48                                 |
|                                 | 10                                  | 102.24                                 | 15.51                             |                                      |                                      |
|                                 | 20                                  | 93.07                                  | 10.53                             |                                      |                                      |
| Method of manufacturer          | 2                                   | 82.31                                  | 17.84                             | 0.12                                 | 0.41                                 |
|                                 | 10                                  | 99.15                                  | 12.26                             |                                      |                                      |
|                                 | 20                                  | 93.96                                  | 13.95                             |                                      |                                      |
